# Supplementary material for: Transcriptome-Wide Identification of miRNAs and Their Targets from Typha angustifolia by RNA-Seq and Their Response to Cadmium Stress
Source: PLoS One. 2015 Apr 29;10(4):e0125462. doi: 10.1371/journal.pone.0125462 (PMC4414455; doi:10.1371/journal.pone.0125462)
Supplement: S5 Table — Pathway ID, KEGG Pathway ID. KEGG pathway is divided two levels, level 1 owns major division of gene function, level 2 owns further division of gene functions within level 1. (XLS) [file pone.0125462.s009.xls]

## Sheet: Sheet1
#	Pathway	All genes with pathway annotation (38058)	Pathway ID	Category:Level 1	Category:Level 2
1	Metabolic pathways	9763 (25.65%)	ko01100	Metabolism	Global map
2	Biosynthesis of secondary metabolites	4027 (10.58%)	ko01110	Metabolism	Global map
3	Plant-pathogen interaction	1992 (5.23%)	ko04626	Organismal Systems	Environmental adaptation
4	Endocytosis	1952 (5.13%)	ko04144	Cellular Processes	Transport and catabolism
5	RNA transport	1898 (4.99%)	ko03013	Genetic Information Processing	Translation
6	Glycerophospholipid metabolism	1888 (4.96%)	ko00564	Metabolism	Lipid metabolism
7	Plant hormone signal transduction	1783 (4.68%)	ko04075	Environmental Information Processing	Signal transduction
8	Ether lipid metabolism	1607 (4.22%)	ko00565	Metabolism	Lipid metabolism
9	Ribosome	1505 (3.95%)	ko03010	Genetic Information Processing	Translation
10	Spliceosome	1451 (3.81%)	ko03040	Genetic Information Processing	Transcription
11	mRNA surveillance pathway	1369 (3.6%)	ko03015	Genetic Information Processing	Translation
12	Starch and sucrose metabolism	1164 (3.06%)	ko00500	Metabolism	Carbohydrate metabolism
13	Purine metabolism	1142 (3%)	ko00230	Metabolism	Nucleotide metabolism
14	Pyrimidine metabolism	1133 (2.98%)	ko00240	Metabolism	Nucleotide metabolism
15	Protein processing in endoplasmic reticulum	996 (2.62%)	ko04141	Genetic Information Processing	Folding, sorting and degradation
16	Glycolysis / Gluconeogenesis	682 (1.79%)	ko00010	Metabolism	Carbohydrate metabolism
17	RNA polymerase	663 (1.74%)	ko03020	Genetic Information Processing	Transcription
18	Phenylpropanoid biosynthesis	654 (1.72%)	ko00940	Metabolism	Biosynthesis of other secondary metabolites
19	Pentose and glucuronate interconversions	641 (1.68%)	ko00040	Metabolism	Carbohydrate metabolism
20	Ubiquitin mediated proteolysis	610 (1.6%)	ko04120	Genetic Information Processing	Folding, sorting and degradation
21	RNA degradation	582 (1.53%)	ko03018	Genetic Information Processing	Folding, sorting and degradation
22	Oxidative phosphorylation	578 (1.52%)	ko00190	Metabolism	Energy metabolism
23	Ribosome biogenesis in eukaryotes	525 (1.38%)	ko03008	Genetic Information Processing	Translation
24	ABC transporters	505 (1.33%)	ko02010	Environmental Information Processing	Membrane transport
25	Pyruvate metabolism	478 (1.26%)	ko00620	Metabolism	Carbohydrate metabolism
26	Phagosome	456 (1.2%)	ko04145	Cellular Processes	Transport and catabolism
27	Amino sugar and nucleotide sugar metabolism	449 (1.18%)	ko00520	Metabolism	Carbohydrate metabolism
28	Circadian rhythm - plant	386 (1.01%)	ko04712	Organismal Systems	Environmental adaptation
29	Arginine and proline metabolism	367 (0.96%)	ko00330	Metabolism	Amino acid metabolism
30	Peroxisome	366 (0.96%)	ko04146	Cellular Processes	Transport and catabolism
31	Nucleotide excision repair	349 (0.92%)	ko03420	Genetic Information Processing	Replication and repair
32	Galactose metabolism	349 (0.92%)	ko00052	Metabolism	Carbohydrate metabolism
33	Glyoxylate and dicarboxylate metabolism	339 (0.89%)	ko00630	Metabolism	Carbohydrate metabolism
34	Carbon fixation in photosynthetic organisms	334 (0.88%)	ko00710	Metabolism	Energy metabolism
35	Phosphatidylinositol signaling system	328 (0.86%)	ko04070	Environmental Information Processing	Signal transduction
36	Fructose and mannose metabolism	317 (0.83%)	ko00051	Metabolism	Carbohydrate metabolism
37	Citrate cycle (TCA cycle)	316 (0.83%)	ko00020	Metabolism	Carbohydrate metabolism
38	Fatty acid metabolism	293 (0.77%)	ko00071	Metabolism	Lipid metabolism
39	Propanoate metabolism	291 (0.76%)	ko00640	Metabolism	Carbohydrate metabolism
40	Tyrosine metabolism	291 (0.76%)	ko00350	Metabolism	Amino acid metabolism
41	Glycerolipid metabolism	286 (0.75%)	ko00561	Metabolism	Lipid metabolism
42	Cysteine and methionine metabolism	275 (0.72%)	ko00270	Metabolism	Amino acid metabolism
43	Cyanoamino acid metabolism	275 (0.72%)	ko00460	Metabolism	Metabolism of other amino acids
44	Valine, leucine and isoleucine degradation	270 (0.71%)	ko00280	Metabolism	Amino acid metabolism
45	Alanine, aspartate and glutamate metabolism	266 (0.7%)	ko00250	Metabolism	Amino acid metabolism
46	Glycosylphosphatidylinositol(GPI)-anchor biosynthesis	264 (0.69%)	ko00563	Metabolism	Glycan biosynthesis and metabolism
47	Phenylalanine metabolism	255 (0.67%)	ko00360	Metabolism	Amino acid metabolism
48	Inositol phosphate metabolism	249 (0.65%)	ko00562	Metabolism	Carbohydrate metabolism
49	Carotenoid biosynthesis	249 (0.65%)	ko00906	Metabolism	Metabolism of terpenoids and polyketides
50	DNA replication	247 (0.65%)	ko03030	Genetic Information Processing	Replication and repair
51	Other glycan degradation	243 (0.64%)	ko00511	Metabolism	Glycan biosynthesis and metabolism
52	Limonene and pinene degradation	241 (0.63%)	ko00903	Metabolism	Metabolism of terpenoids and polyketides
53	Tryptophan metabolism	238 (0.63%)	ko00380	Metabolism	Amino acid metabolism
54	Pentose phosphate pathway	236 (0.62%)	ko00030	Metabolism	Carbohydrate metabolism
55	Basal transcription factors	233 (0.61%)	ko03022	Genetic Information Processing	Transcription
56	Base excision repair	233 (0.61%)	ko03410	Genetic Information Processing	Replication and repair
57	Stilbenoid, diarylheptanoid and gingerol biosynthesis	231 (0.61%)	ko00945	Metabolism	Biosynthesis of other secondary metabolites
58	Glycine, serine and threonine metabolism	230 (0.6%)	ko00260	Metabolism	Amino acid metabolism
59	Photosynthesis	220 (0.58%)	ko00195	Metabolism	Energy metabolism
60	Glutathione metabolism	217 (0.57%)	ko00480	Metabolism	Metabolism of other amino acids
61	Lysine degradation	217 (0.57%)	ko00310	Metabolism	Amino acid metabolism
62	Ascorbate and aldarate metabolism	216 (0.57%)	ko00053	Metabolism	Carbohydrate metabolism
63	Homologous recombination	212 (0.56%)	ko03440	Genetic Information Processing	Replication and repair
64	Flavonoid biosynthesis	211 (0.55%)	ko00941	Metabolism	Biosynthesis of other secondary metabolites
65	Sphingolipid metabolism	210 (0.55%)	ko00600	Metabolism	Lipid metabolism
66	Mismatch repair	209 (0.55%)	ko03430	Genetic Information Processing	Replication and repair
67	beta-Alanine metabolism	202 (0.53%)	ko00410	Metabolism	Metabolism of other amino acids
68	Nitrogen metabolism	192 (0.5%)	ko00910	Metabolism	Energy metabolism
69	Aminoacyl-tRNA biosynthesis	192 (0.5%)	ko00970	Genetic Information Processing	Translation
70	Regulation of autophagy	189 (0.5%)	ko04140	Cellular Processes	Transport and catabolism
71	Porphyrin and chlorophyll metabolism	185 (0.49%)	ko00860	Metabolism	Metabolism of cofactors and vitamins
72	Histidine metabolism	185 (0.49%)	ko00340	Metabolism	Amino acid metabolism
73	Terpenoid backbone biosynthesis	181 (0.48%)	ko00900	Metabolism	Metabolism of terpenoids and polyketides
74	Ubiquinone and other terpenoid-quinone biosynthesis	177 (0.47%)	ko00130	Metabolism	Metabolism of cofactors and vitamins
75	N-Glycan biosynthesis	169 (0.44%)	ko00510	Metabolism	Glycan biosynthesis and metabolism
76	Proteasome	167 (0.44%)	ko03050	Genetic Information Processing	Folding, sorting and degradation
77	alpha-Linolenic acid metabolism	165 (0.43%)	ko00592	Metabolism	Lipid metabolism
78	Protein export	164 (0.43%)	ko03060	Genetic Information Processing	Folding, sorting and degradation
79	Glycosaminoglycan degradation	162 (0.43%)	ko00531	Metabolism	Glycan biosynthesis and metabolism
80	Natural killer cell mediated cytotoxicity	152 (0.4%)	ko04650	Organismal Systems	Immune system
81	Fatty acid biosynthesis	150 (0.39%)	ko00061	Metabolism	Lipid metabolism
82	Phenylalanine, tyrosine and tryptophan biosynthesis	147 (0.39%)	ko00400	Metabolism	Amino acid metabolism
83	Biosynthesis of unsaturated fatty acids	138 (0.36%)	ko01040	Metabolism	Lipid metabolism
84	Butanoate metabolism	138 (0.36%)	ko00650	Metabolism	Carbohydrate metabolism
85	Zeatin biosynthesis	131 (0.34%)	ko00908	Metabolism	Metabolism of terpenoids and polyketides
86	Steroid biosynthesis	129 (0.34%)	ko00100	Metabolism	Lipid metabolism
87	Folate biosynthesis	128 (0.34%)	ko00790	Metabolism	Metabolism of cofactors and vitamins
88	Glycosphingolipid biosynthesis - ganglio series	125 (0.33%)	ko00604	Metabolism	Glycan biosynthesis and metabolism
89	Non-homologous end-joining	123 (0.32%)	ko03450	Genetic Information Processing	Replication and repair
90	Cutin, suberine and wax biosynthesis	122 (0.32%)	ko00073	Metabolism	Lipid metabolism
91	SNARE interactions in vesicular transport	121 (0.32%)	ko04130	Genetic Information Processing	Folding, sorting and degradation
92	Brassinosteroid biosynthesis	102 (0.27%)	ko00905	Metabolism	Metabolism of terpenoids and polyketides
93	Photosynthesis - antenna proteins	101 (0.27%)	ko00196	Metabolism	Energy metabolism
94	Sulfur metabolism	93 (0.24%)	ko00920	Metabolism	Energy metabolism
95	Flavone and flavonol biosynthesis	87 (0.23%)	ko00944	Metabolism	Biosynthesis of other secondary metabolites
96	Fatty acid elongation	84 (0.22%)	ko00062	Metabolism	Lipid metabolism
97	Circadian rhythm - mammal	80 (0.21%)	ko04710	Organismal Systems	Environmental adaptation
98	One carbon pool by folate	80 (0.21%)	ko00670	Metabolism	Metabolism of cofactors and vitamins
99	Nicotinate and nicotinamide metabolism	77 (0.2%)	ko00760	Metabolism	Metabolism of cofactors and vitamins
100	Valine, leucine and isoleucine biosynthesis	77 (0.2%)	ko00290	Metabolism	Amino acid metabolism
101	Pantothenate and CoA biosynthesis	75 (0.2%)	ko00770	Metabolism	Metabolism of cofactors and vitamins
102	Diterpenoid biosynthesis	73 (0.19%)	ko00904	Metabolism	Metabolism of terpenoids and polyketides
103	Linoleic acid metabolism	72 (0.19%)	ko00591	Metabolism	Lipid metabolism
104	Selenocompound metabolism	69 (0.18%)	ko00450	Metabolism	Metabolism of other amino acids
105	Isoquinoline alkaloid biosynthesis	60 (0.16%)	ko00950	Metabolism	Biosynthesis of other secondary metabolites
106	Tropane, piperidine and pyridine alkaloid biosynthesis	58 (0.15%)	ko00960	Metabolism	Biosynthesis of other secondary metabolites
107	Arachidonic acid metabolism	58 (0.15%)	ko00590	Metabolism	Lipid metabolism
108	Riboflavin metabolism	55 (0.14%)	ko00740	Metabolism	Metabolism of cofactors and vitamins
109	Sulfur relay system	50 (0.13%)	ko04122	Genetic Information Processing	Folding, sorting and degradation
110	Other types of O-glycan biosynthesis	50 (0.13%)	ko00514	Metabolism	Glycan biosynthesis and metabolism
111	Benzoxazinoid biosynthesis	49 (0.13%)	ko00402	Metabolism	Biosynthesis of other secondary metabolites
112	Isoflavonoid biosynthesis	42 (0.11%)	ko00943	Metabolism	Biosynthesis of other secondary metabolites
113	Vitamin B6 metabolism	39 (0.1%)	ko00750	Metabolism	Metabolism of cofactors and vitamins
114	Taurine and hypotaurine metabolism	36 (0.09%)	ko00430	Metabolism	Metabolism of other amino acids
115	Lysine biosynthesis	36 (0.09%)	ko00300	Metabolism	Amino acid metabolism
116	Synthesis and degradation of ketone bodies	33 (0.09%)	ko00072	Metabolism	Lipid metabolism
117	Glycosphingolipid biosynthesis - globo series	31 (0.08%)	ko00603	Metabolism	Glycan biosynthesis and metabolism
118	Thiamine metabolism	31 (0.08%)	ko00730	Metabolism	Metabolism of cofactors and vitamins
119	Sesquiterpenoid and triterpenoid biosynthesis	27 (0.07%)	ko00909	Metabolism	Metabolism of terpenoids and polyketides
120	Monoterpenoid biosynthesis	27 (0.07%)	ko00902	Metabolism	Metabolism of terpenoids and polyketides
121	Glucosinolate biosynthesis	26 (0.07%)	ko00966	Metabolism	Biosynthesis of other secondary metabolites
122	Indole alkaloid biosynthesis	26 (0.07%)	ko00901	Metabolism	Biosynthesis of other secondary metabolites
123	C5-Branched dibasic acid metabolism	17 (0.04%)	ko00660	Metabolism	Carbohydrate metabolism
124	Biotin metabolism	16 (0.04%)	ko00780	Metabolism	Metabolism of cofactors and vitamins
125	Lipoic acid metabolism	14 (0.04%)	ko00785	Metabolism	Metabolism of cofactors and vitamins
126	Anthocyanin biosynthesis	8 (0.02%)	ko00942	Metabolism	Biosynthesis of other secondary metabolites
127	Caffeine metabolism	6 (0.02%)	ko00232	Metabolism	Biosynthesis of other secondary metabolites
128	Betalain biosynthesis	4 (0.01%)	ko00965	Metabolism	Biosynthesis of other secondary metabolites
Pathway ID, KEGG Pathway ID
KEGG pathway is divided two levels, level 1 owns major division of gene function, level 2 owns further division of gene functions within level 1.
